1 **Studying magnetic susceptibility,**  
2 **microstructural compartmentalisation and**  
3 **chemical exchange in a formalin-fixed ex vivo**  
4 **human brain specimen**

5 Kwok-Shing Chan<sup>1</sup>, Renaud Hédouin<sup>1,2</sup>, Jeroen Mollink<sup>3</sup>, Jenni Schulz<sup>1</sup>, Anne-Marie van  
6 Cappellen van Walsum<sup>3</sup> and José P. Marques<sup>1</sup>

7

8 <sup>1</sup> Donders Institute for Brain, Cognition and Behaviour, Radboud University, Nijmegen, The  
9 Netherlands

10 <sup>2</sup> Empenn, INRIA, INSERM, CNRS, Université de Rennes 1, Rennes, France

11 <sup>3</sup> Department of Medical Imaging, Anatomy, Donders Institute for Brain, Cognition and  
12 Behaviour, Radboud University Medical Center, Nijmegen, The Netherlands

13

14 **Running title**

15 Probing white matter phase mechanisms using formalin-fixed tissue

16

17 **Correspondence to**

18 Kwok-Shing Chan, M.Sc.

19 Kapittelweg 29

20 6525 EN, Nijmegen

21 The Netherlands

22 -Tel number: +31 024-3668494

23 -Email: k.chan@donders.ru.nl

24

25 **Word count**

26 3834

27

## 28 **Abstract**

29 **Purpose:** Ex vivo imaging is a preferable method to study the biophysical mechanism of white  
30 matter orientation-dependent signal phase evolution. Yet, how formalin fixation, commonly  
31 used for tissue preservation, affects the phase measurement is not fully known. We, therefore,  
32 study the impacts of formalin fixation on magnetic susceptibility, microstructural  
33 compartmentalisation and chemical exchange measurement on human brain tissue.

34  
35 **Methods:** A formalin-fixed, post-mortem human brain specimen was scanned with multiple  
36 orientations with respect to the main magnetic field direction for robust bulk magnetic  
37 susceptibility measurement with conventional quantitative susceptibility imaging models.  
38 Homogeneous white matter tissues were subsequently excised from the whole-brain  
39 specimen and scanned in multiple rotations on an MRI scanner to measure the anisotropic  
40 magnetic susceptibility and microstructure-related contributions in the signal phase. Electron  
41 microscopy was used to validate the MRI findings.

42  
43 **Results:** The bulk isotropic magnetic susceptibility of ex vivo whole-brain imaging is  
44 comparable to in vivo imaging, with noticeable enhanced non-susceptibility contributions. The  
45 excised specimen experiment reveals that anisotropic magnetic susceptibility and  
46 compartmentalisation phase effect were considerably reduced in formalin-fixed white matter  
47 tissue.

48  
49 **Conclusions:** Despite formalin-fixed white matter tissue has comparable bulk isotropic  
50 magnetic susceptibility to those measured via in vivo imaging, its orientation-dependent  
51 components in the signal phase related to the tissue microstructure is substantially weaker,  
52 making it less favourable in white matter microstructure studies using phase imaging.

53  
54 **Keywords:** Quantitative susceptibility imaging, phase imaging, ex vivo imaging,  
55 microstructure, white matter

56  
57  
58

## 59 Introduction

60 Quantitative susceptibility mapping (QSM) is a physics-driven method to the study magnetic  
61 properties of biological tissues (1). Some features that differentiated it from conventional MR  
62 relaxometry include the field strength independence of the derived maps, relying on spatial  
63 deconvolution and its ability to distinguish paramagnetic and diamagnetic substances since  
64 they produce opposite contrasts. QSM is commonly performed on gradient echo phase data  
65 owing to its direct relationship to magnetic field variations (2,3).

66  
67 One major QSM research challenge is to understand the mechanism of phase evolution in  
68 white matter (WM) (4,5). In deep grey matter (GM), strong correlations between QSM and iron  
69 concentration have been demonstrated (6). Yet, in WM, the abundance of diamagnetic myelin  
70 (relative to water) would have suggested a strong QSM contrast relative to cerebrospinal fluid  
71 (CSF) (4,5). The lack of this strong contrast has been attributed to various biophysical  
72 phenomena (7,8). The lipid-rich myelin bilayer sheath encapsulating the highly-ordered axons  
73 in WM results in anisotropic susceptibility (7–12). Additionally, water protons exist in various  
74 microstructural environments (13), namely myelin water, intra-axonal water and extra-axonal  
75 water, which can have different signal decay rates and frequency shifts depending on the  
76 composition of the tissue and the fibre orientation with respect to the main magnetic field ( $B_0$ )  
77 (14–17), which also make the signal phase not representing the average magnetic field in a  
78 voxel. The chemical exchange of protons between macromolecules and water can also  
79 introduce a further frequency shift of the MR signal (18,19). Disentangling the origins of WM  
80 phase contrast can improve our understanding of QSM and provide new means to account for  
81 their impact in QSM.

82  
83 As WM phase contrast is orientation-dependent, studying its properties requires data acquired  
84 with different orientations to  $B_0$ . Subject compliance limits the range of angles that can be  
85 obtained in vivo (unnatural posture inside the scanner). Experiments with ex vivo samples, on  
86 the other hand, do not suffer from this limitation, allowing long scanning sessions without data  
87 degradation caused by motion and for histology to be performed as a means of validation of  
88 any microstructural findings (20,21). One shortcoming of ex vivo experiments is that MR  
89 measured parameters in tissues undergone formalin fixation (a common practice to preserve  
90 human post-mortem tissue) show substantial differences to those found in vivo. Those  
91 differences have been seen both on single- and multi-compartment relaxometry, and diffusion-  
92 weighted imaging (22,23). Yet, a previous study showed that the bulk magnetic susceptibility  
93 of brain tissues measured by QSM did not change significantly between in vivo and ex vivo

94 conditions, and also during a 6-week fixation period (24). This finding is in agreement with the  
95 experiment results when studying the microstructural effect in phase imaging (25), where  
96 comparable bulk magnetic susceptibilities were observed between fresh and fixed rat optic  
97 nerves but the origins of the susceptibility contrast are different.

98

99 In this study, we investigate the magnetic susceptibility, compartmentalisation and chemical  
100 shift effects on the MR phase using a formalin-fixed, post-mortem human brain specimen for  
101 WM phase-contrast mechanism studies at 3T, providing comprehensive insights for the use  
102 of fixed tissue in future QSM methodology studies. We performed multiple orientation  
103 experiments in both whole-brain and excised tissue samples (26). This enabled us to obtain  
104 both traditional QSM maps and ground truth bulk magnetic susceptibility measurements of the  
105 excised samples, as well as a separate estimation of microstructure compartmentalisation  
106 information. The samples were then studied using electron microscopy (EM) to further  
107 evaluate microstructural correlates between MR and histology.

108



## 109 **Methods**

110 The study is divided into 3 parts:

111 1) a post-mortem, formalin-fixed human brain specimen was scanned on an MRI scanner in  
112 multiple orientations with respect to  $B_0$  for robust magnetic susceptibility measurements;

113 2) homogeneous WM specimens were excised from the whole-brain specimen, embedded in  
114 agar and subsequently scanned again in various orientations in respect of  $B_0$  to measure their  
115 magnetic susceptibility and microstructure-induced field, similar to the experiment conducted  
116 by (26);

117 3) the WM specimens used in the second part of the study were imaged by 3D EM, allowing  
118 MRI data to be compared to histology.

119

## 120 **Tissue processing**

121 A post-mortem human brain specimen from a deceased male (aged 78 years old) with no  
122 history of neurological disorder (cause of death: myocardial infarction) was used for this  
123 research in accordance with the local ethics committee and the Anatomy Department of  
124 Radboud University Medical Center (Radboudumc, Nijmegen, the Netherlands). The brain  
125 specimen was immersed in 10% formalin for tissue fixation after being extracted from the skull.

126

127 After one month of fixation, the specimen was scanned on an MRI scanner (imaging details in  
128 section 2.2) to obtain the brain morphology for creating a tailor-made holder. The holder was  
129 made of a stack of 35 4-mm thick, 3D-printed plastic plates having space with the same shape  
130 of the specimen in the centre, covering most of the brain (see Figure 1) where the specimen  
131 can be fitted tightly inside the holder and a surrounding spherical container. Each plate has a  
132 grid layout with 4 mm x 4 mm elements, providing landmarks in MRI images for planning and  
133 guidance of tissue excision for the validation experiment in the second MRI session.

134

135 After the first MRI session, 10 homogeneous WM regions of interest (ROIs) were identified  
136 (DTI fractional anisotropy  $\geq 0.45$ ) with excisable volume ( $\geq 1$  element of the holder plate grid,  
137 i.e., 64 mm<sup>3</sup>). These WM tissues and 2 additional deep GM tissues (one from globus pallidus  
138 and one from putamen) were then excised and embedded in 1% low-gelling temperature  
139 agarose (A9414, Sigma Aldrich, Germany; with demineralised water) to ensure no extra tissue  
140 protein denaturation would occur between the two acquisitions. The samples were positioned  
141 in a polymethyl methacrylate cylindrical container with the main fibre orientation perpendicular  
142 to the cylindrical axis. Imaging was performed about 1 day after the excised specimens were  
143 acquired and 5 days after the whole brain scan.

144  
145  
146  
147  
148  
149  
150  
151  
152

EM was utilised to provide an additional reference to understand and explain the MRI findings. Two days after the second MRI session, the WM specimens were sectioned to 100  $\mu\text{m}$  on a vibratome (VT1000S, Leica Biosystems, Nussloch, Germany) before being immersed in 2.5% glutaraldehyde in 0.1M sodium cacodylate buffer for overnight incubation at 4°C. The specimens were then transferred to 0.25% glutaraldehyde in 0.1M sodium cacodylate buffer for storage at 4°C, and then delivered to the EM facility at the University of Oxford for imaging. The workflow of this study is summarised in Figure 1.

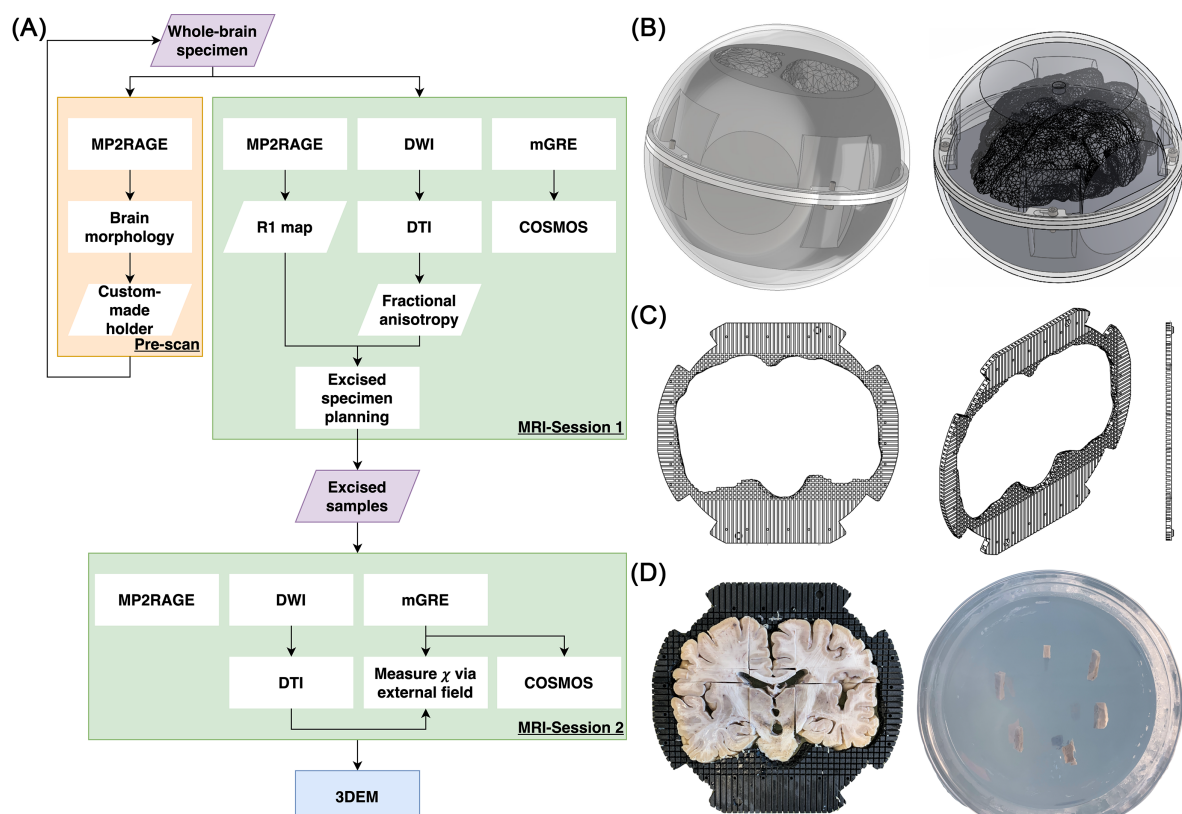

153  
154  
155  
156  
157  
158  
159  
160  
161  
162  
163

Figure 1: (A) A summary of this study, consisting of a pre-scan, two MRI sessions and a 3D EM session. (B) Schematic of the experimental setup used in the first MRI session. The setup is made of two parts: an outer transparent sphere allowing free rotation of the specimen and a tailor-made inner holder to ensure the specimen was in a fixed position inside the sphere. (C) Schematic of the plate which forms the inner holder. The centre of the plate is a space with the shape of the specimen, surrounded by a grid structure providing location reference in MRI image (the gaps filled with water while the plate material gave no detectable signal), and guidance in sample excision for the second imaging session. (D) An illustration of how homogenous samples were acquired with the aids of the plate (right) and the excised specimens were embedded in the agar inside the cylindrical container (left).

## 164 MRI experiments

### 165 Data acquisition

166 The study was approved by the local ethics committee. All MRI data were acquired on a 3T  
167 scanner (Prisma, Siemens, Erlangen, Germany) at room temperature (20°C) using a 64-  
168 channel array head/neck coil (with only 48 head channels were enabled). The experiment  
169 consisted of two imaging sessions: the first session was conducted on the whole-brain  
170 specimen and the second session was conducted on the excised brain tissues. The following  
171 protocol was used for the first session:

- 172 (1) MP2RAGE adopted to sensitise for  $T_1$  values between 250 ms and 1000 ms, 1 mm  
173 isotropic resolution,  $T11/T12/TR=311/1600/3000$  ms, flip angle ( $\alpha$ ) #1/#2 =  $4^\circ/6^\circ$ , Tacq  
174 = 5 min;
- 175 (2) 2D spin-echo EPI DWI, 1.6 mm isotropic,  $TR/TE=15241/77.6$  ms, 2-shell  
176 ( $b=0/1250/2500$  s/mm<sup>2</sup>, 17/120/120 measurements with 7  $b=0$  measurements  
177 collected with reversed phase-encode blips for distortion correction), 20 repetitions,  
178 Tacq = 5.6 hours;
- 179 (3) Monopolar, 3D multi-echo GRE, 1 mm isotropic resolution,  
180  $TR/TE1/\Delta TE/TE6=40/3.45/6.27/34.8$  ms,  $\alpha=20^\circ$  (optimised for WM  $T_1$ ), 10 orientations  
181 with respect to  $B_0$ , chosen to optimise microstructural information decoding (27); Tacq  
182 = 1.7 hours.

183  
184 In the second scanning session, the excised specimens were scanned with the following  
185 protocol:

- 186 (1) MP2RAGE sequence with the same parameters as above;
- 187 (2) 2D spin-echo EPI DWI, 1 mm isotropic,  $TR/TE=15241/77.6$  ms, 2-shell  
188 ( $b=0/1250/2500$  s/mm<sup>2</sup>, 17/120/120 measurements with 7  $b=0$  measurements), 9  
189 repetitions, Tacq = 9 hours;
- 190 (3) Monopolar, 3D multi-echo GRE, 0.7 mm isotropic resolution,  
191  $TR/TE1/dTE/TE6=40/3.45/6.27/34.8$  ms, FA= $15^\circ$  (optimised for agar  $T_1$ ), 10  
192 orientations with respect to  $B_0$  (acquisition order was randomised); Tacq = 5.3 hours.

193

### 194 Data processing

195 Each DWI repetition was pre-processed separately with MP-PCA denoising (28),  
196 susceptibility-induced distortion correction (29,30) and eddy current-induced distortion

197 correction (31). DTI model was then utilised on the DWI data after averaging all repetitions.  
198  $R_1$  maps and DTI results were then linearly registered to the GRE data using ANTs (32).

199

200 GRE data with all orientations were first corrected for gradient nonlinearity induced geometric  
201 distortion and then linearly registered to a common space, independent of the experiment  
202 orientations.  $R_2^*$  maps were computed using a closed-form solution (33). Field maps were  
203 computed using SEGUE (34) spatial phase unwrapping with optimum-weighted echo  
204 combination (35) and tissue field maps were computed using LBV (36) in SEPIA (37). For the  
205 whole-brain data, bulk isotropic magnetic susceptibility was derived using COSMOS (38).  
206 Additionally, the QUASAR algorithm for multi-orientations was also applied to test if the bulk  
207 isotropic magnetic susceptibility measurement improved when the field generated by non-  
208 susceptibility contributions ( $f_\rho$ ) were simultaneously estimated (39):

$$209 \quad f_N = d_N * \chi + f_\rho \text{ [Eq. 1]}$$

210 where  $f_N$  and  $d_N$  are the tissue field and a unit dipole field associated with the acquisition at  
211 orientation N and \* is the convolution operator.

212

213 For the excised specimen data, in addition to the computation of the bulk isotropic magnetic  
214 susceptibility using COSMOS, quantification of isotropic and anisotropic magnetic  
215 susceptibility ( $\chi_i$  and  $\chi_a$ ) of the sample without confounding with non-susceptibility  
216 microstructural contributions was performed by fitting the measured field  $f_N$  on the agar  
217 surrounding the specimen in the following manner (26):

$$218 \quad \min_{\chi_i \& \chi_a} \|M_{\text{agar}}(f_N - \chi_i \delta f_{i,N} - \chi_a \delta f_{a,N} - C_N)\| \text{ [Eq. 2]}$$

219 where:  $M_{\text{agar}}$  is the binary mask on agar with inner and outer boundaries 1 and 5 voxels away  
220 from the specimen tissue boundary in all directions;  $\delta f_{i,N}$  and  $\delta f_{a,N}$  are the frequency  
221 perturbations generated by a homogeneous specimen per unit of isotropic and anisotropic  
222 magnetic susceptibility at orientation N, with its orientation of tensor derived from obtained  
223 from DTI; and  $C_N$  accounts for any baseline frequency differences in agar due to either  
224 chemical exchange in the agar compartment or any residuals remaining after background field  
225 removal for a particular orientation. Linear regression analysis was then conducted to compare  
226 the magnetic susceptibility measurements between the COSMOS and external field method,  
227 and between the two imaging sessions to determine if the excised specimens agree with the  
228 ROIs in the whole-brain imaging data.

229

230 Tissue compartmentalisation contributions to the MR phase can be measured as the residual  
231 field ( $f_R$ ) inside the specimen with mask  $M_{\text{specimen}}$ :

232 
$$f_{R,N} = \overline{M_{specimen}(f_N - \chi_l \delta f_{l,N} - \chi_a \delta f_{a,N})} [Eq. 3].$$

233 which is expected to vary with the angle  $\theta$  between the fibre direction and  $B_0$  as

234 
$$f_{R,N} = A \sin^2 \theta_N + B [Eq. 4]$$

235 where A accounts for the microstructure orientation-dependent effect of the specimen and B  
236 is orientation-invariant, related to both magnetisation exchange and microstructure (26).

237

## 238 **Electron microscopy**

239 Two corpus callosum (CC) specimens from the second MRI session (CC4 and CC5) having  
240 the greatest discrepancy of the microstructural compartmentalisation effect underwent 3D EM  
241 (40) to provide histology data for the MRI experiment validation. Each of the EM images has  
242 a matrix size of 8000×8000 with an in-plane resolution of 13.7×13.7 nm (~0.11x0.11mm FOV)  
243 and slice thickness of 100 nm. In total, 651 and 623 slices were acquired for CC4 and CC5  
244 respectively.

245

246 Our EM data showed similar myelin sheath damage (splitting and swelling) as illustrated in  
247 (41), resulting in unsatisfactory compartmental classification (intra-axonal, myelin and extra-  
248 axonal compartments) from standard segmentation tools. To facilitate high-quality 3-  
249 compartment classification, we first performed a semi-automatic intra-axonal segmentation  
250 using ITK-snap (42) on down-sampled 3D EM data (87.7×87.7 nm and 100 consecutive slices).  
251 The myelin sheath of each axon was initially defined by expanding the axon assuming a g-  
252 ratio = 0.5 (for axon diameters < 1.2μm) or 0.6 (otherwise), followed by intensity thresholding  
253 using the EM images. The resulting myelin mask is clearly influenced by the chosen threshold,  
254 therefore, myelin volume fractions (MVF) derived from 5 threshold values range from 125 to  
255 145 (step size of 5, most frequent intensities in the myelin mask are 104 (CC4) and 88 (CC5))  
256 were reported. To account for the enlarged myelin volume due to swelling, we also computed  
257 the image intensity corrected myelin probability as:

258 
$$\text{Myelin probability} = \begin{cases} 1, & I < M \\ \frac{A - I}{A - M}, & M < I \leq A \\ 0, & I > A \end{cases} [Eq. 5]$$

259 where A and M are the most frequent values inside the axonal and myelin masks and I is the  
260 intensity of a voxel. The axon and myelin masks of each myelinated axon were eventually  
261 combined in a single classification map to avoid repeated counts due to overlapping between  
262 neighbouring axons.

263

264 Axonal volume fraction (AVF) and MVF were computed by counting the total number of voxels  
265 of each compartment in the classification map, and were used to derive the sample g-ratio  
266 (20). Effective axonal diameter was defined as the square root of the product of the 2<sup>nd</sup> and  
267 3<sup>rd</sup> principal axis lengths of the axons obtained from the regionprop3 function of MATLAB  
268 (Mathworks, Natick, US), from which the median and the skewness of the axonal diameter  
269 distribution were computed. Fibre dispersion was computed from the axonal volume-weighted  
270 average squared dot product between the axon main principal direction and the average  
271 orientation of the entire sample (27). To further investigate the effect of realistic myelin sheath  
272 geometry on the compartmental frequency shifts, field perturbations induced from myelin  $\chi_i$   
273 was simulated in two scenarios: when the segmented sample axons were parallel or  
274 perpendicular to  $B_0$ . The frequency shift distribution in the extracellular space was  
275 subsequently analysed.  
276



## 277 Results

278 Whole-brain imaging results are shown in Figure 2. The  $R_1$  maps obtained from the first  
279 session (5-month fixation) show faster relaxation rates than those from the pre-scan (1-month  
280 fixation), with the contrast between WM and cortical GM being clearly reduced, and DGM  
281 showing increased  $R_1$  (Figure 2A and 2B). The COSMOS derived magnetic susceptibilities  
282 are in reasonable agreement with previously published in vivo data (see supplementary Figure  
283 S1), where opposite magnetic susceptibility between WM and GM can be observed (Figure  
284 2C). However, the residual field of the COSMOS estimation shows a slowly-varying pattern  
285 across the brain that cannot be explained by the isotropic dipole field (Figure 2E) and is  
286 relatively stable across orientations (see Figure 2F). This residual map shares similar contrast  
287 and values with the QUASAR non-susceptibility contributions map (Figure 2H). Hence, not  
288 surprisingly, the bulk magnetic susceptibilities derived from QUASAR (Figure 2G) and  
289 COSMOS (Figure 2c) are comparable. Susceptibility tensor imaging was also performed, yet  
290 the results beyond the mean susceptibility tensor were found not informative.

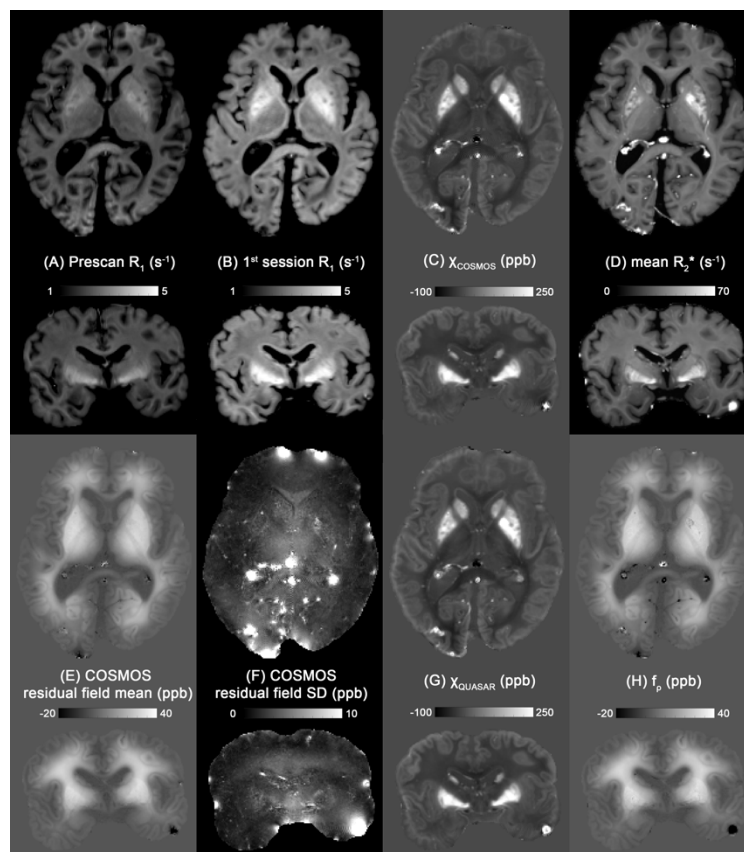

291  
292 Figure 2: Quantitative maps of the whole-brain specimens in transverse and coronal directions. (A)  $R_1$   
293 map obtained from a pre-scan after 1-month of formalin fixation and (B)  $R_1$  map obtained from the 1<sup>st</sup>  
294 imaging session while the brain was fixed for 5 months. (C) COSMOS derived bulk magnetic  
295 susceptibility, (D) mean  $R_2^*$  map across the 10 rotations, (E and F) mean and standard deviation of the

296 residual fields from COSMOS across orientations, (G and H) QUASAR derived bulk magnetic  
 297 susceptibility map and non-susceptibility contribution map.

298

299 Figure 3 shows the magnetic susceptibility of the excised specimens measured via the  
 300 external field on agar with their ROIs illustrated in the whole-brain  $R_1$  map. The mean  $\chi_i$  and  
 301  $\chi_a$  are  $-1.17 \pm 9.18$  ppb and  $4.03 \pm 1.63$  ppb across WM specimens. A relatively strong positive  
 302  $\chi_i$  is found in the corticospinal tract specimen (CST; 19.17 ppb), which was found in retrospect  
 303 to be due to some DGM residual in one end of the excised sample. The coefficient A of  $\sin^2\theta$   
 304 dependence reflecting the WM microstructure effect has a mean of  $1.46 \pm 1.55$  ppb with a mean  
 305 intercept B of  $-2.75 \pm 0.79$  ppb in WM. However, the  $R^2$  of the specimen residual field fitting  
 306 suggests that not all WM specimens fit the  $\sin^2\theta$  function equally well, particularly for samples  
 307 obtained from the genu and splenium of the CC (CC7-CC9;  $R^2$  ranging from 0.01 to 0.71).  
 308 Therefore, we focused on the 6 WM specimens obtained from the body of the CC (CC1-CC6)  
 309 in comparison to the whole-brain data in the linear regression analysis.

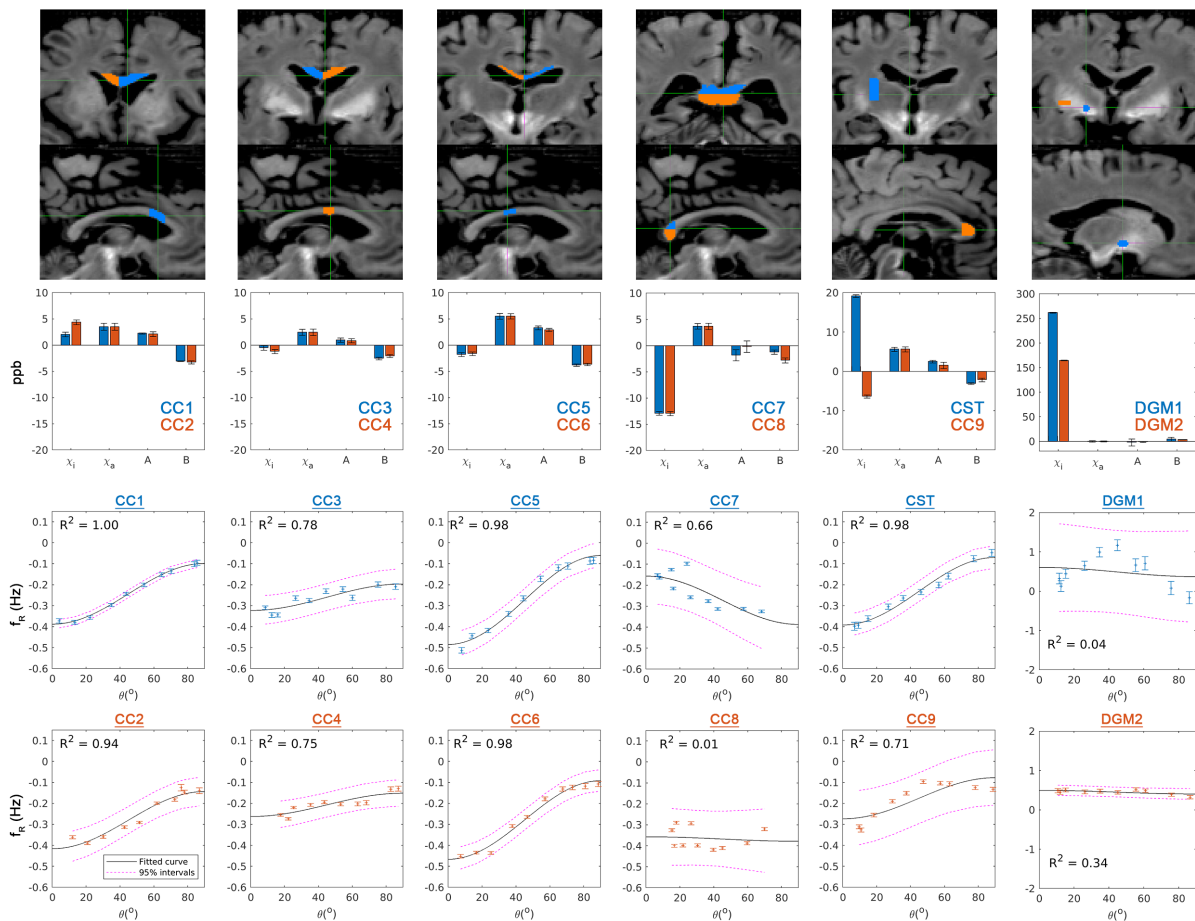

310

311 Figure 3: (Middle row) Barplots of isotropic and anisotropic magnetic susceptibility, and coefficients A  
 312 and B of the fitting of  $\sin^2\theta$ . (Bottom two rows) Fittings of  $\sin^2\theta$  reflecting microstructure  
 313 compartmentalisation of the excised specimens. Each column shows the results of two specimens with  
 314 their ROIs illustrated in the whole-brain  $R_1$  map (top two rows). Error bar indicates the standard error



315 (except for the coefficients A and B in the barplots; 95% confidence intervals in this case). CC: corpus  
 316 callosum; CST: corticospinal tract; DGM1: globus pallidus; DGM2: putamen.

317

318 Strong linear relations were found in mean susceptibility estimated by COSMOS between the  
 319 excised specimens and the corresponding ROI in the whole-brain data (cross-session;  
 320  $R^2=0.603$ , Figure 4A), between the  $\chi_i$  from external field measurement and the mean  
 321 COSMOS susceptibility in the whole-brain data (cross-session, cross-method;  $R^2=0.783$ ,  
 322 Figure 4B), and between the  $\chi_i$  from external field measurement and the mean COSMOS  
 323 susceptibility on the excised specimens (cross-method;  $R^2=0.925$ , Figure 4C). All the slopes  
 324 of the linear regressions are close to 1, whereas the relatively large intercepts in Figure 4A-B  
 325 reflect the different reference medium in the scans (1<sup>st</sup> session: water; 2<sup>nd</sup> session: 1% agar).

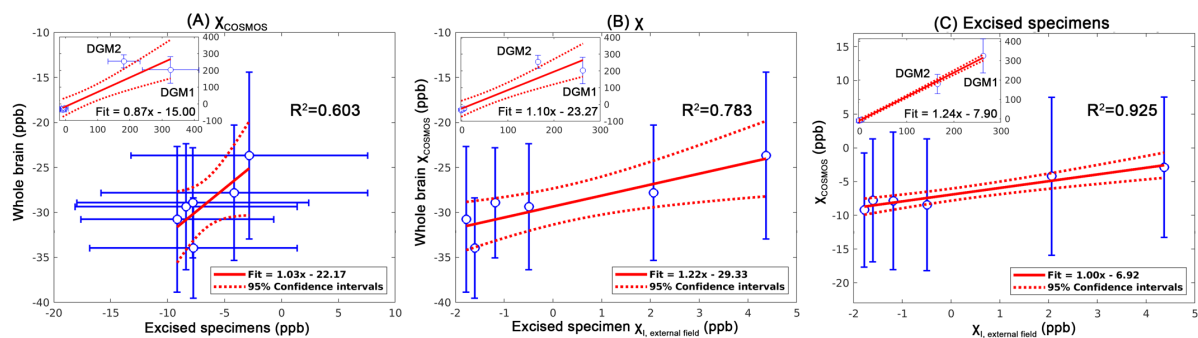

326

327 Figure 4: Linear regression analyses on the 6 WM specimens of (A) the magnetic susceptibility  
 328 measured between two imaging sessions using COSMOS, (B) between the bulk magnetic susceptibility  
 329 measured by COSMOS on the first session and the  $\chi_i$  from external field measurement on the second  
 330 session, and (C) the excised specimens between COSMOS magnetic susceptibility and external field  
 331 derived  $\chi_i$ . Blue points: measurement data; solid red line: fitted line; dash line: 95% confidence interval;  
 332 error bar: standard deviation. The subplot of each panel shows the regression result when the DGM  
 333 specimens were included.

334

335 The microstructural properties of two WM specimens (CC4: relatively weaker microstructural  
 336 phase; CC5: strong microstructural phase) derived from 3D EM data are summarised in Figure  
 337 5. Both specimens have similar MVF (8% difference), AVF (4% difference) and axonal  
 338 diameter (1% difference). Noticeable differences are observed in fibre dispersion (50%  
 339 difference) and in the FWHM of the extra-axonal frequency distributions when the fibre  
 340 direction is parallel to  $B_0$  (63% difference), the latter being attributed to the differences of both  
 341 fibre dispersion and the spatial distribution of myelinated axons.

342

|                                                                                              |                                         | <b>CC4</b>                         | <b>CC5</b>                         |
|----------------------------------------------------------------------------------------------|-----------------------------------------|------------------------------------|------------------------------------|
| <b># of Axons</b>                                                                            |                                         | 1607                               | 1565                               |
| <b>Effective axonal diameter</b>                                                             | <b>Median, <math>\mu\text{m}</math></b> | 0.944                              | 0.957                              |
|                                                                                              | <b>Skewness</b>                         | 1.798                              | 2.058                              |
| <b>Dispersion</b>                                                                            |                                         | 0.135                              | 0.081                              |
| <b>AVF</b>                                                                                   |                                         | 0.183                              | 0.192                              |
| <b>MVF</b>                                                                                   |                                         | 0.272, 0.304, 0.328*, 0.345, 0.357 | 0.283, 0.304, 0.321*, 0.334, 0.344 |
| <b>MVF corrected</b>                                                                         |                                         | 0.245, 0.265, 0.278*, 0.285, 0.289 | 0.238, 0.249, 0.257*, 0.261, 0.264 |
| <b>g-ratio</b>                                                                               |                                         | 0.599                              | 0.611                              |
| <b>g-ratio corrected</b>                                                                     |                                         | 0.630                              | 0.654                              |
| <b>Peak of extracellular frequency shift caused by myelin <math>\chi_1</math> (FWHM), Hz</b> | <b><math>\theta=0^\circ</math></b>      | -0.735 (0.829)                     | 0.194 (0.434)                      |
|                                                                                              | <b><math>\theta=90^\circ</math></b>     | -2.189 (1.85)                      | -0.919 (1.834)                     |

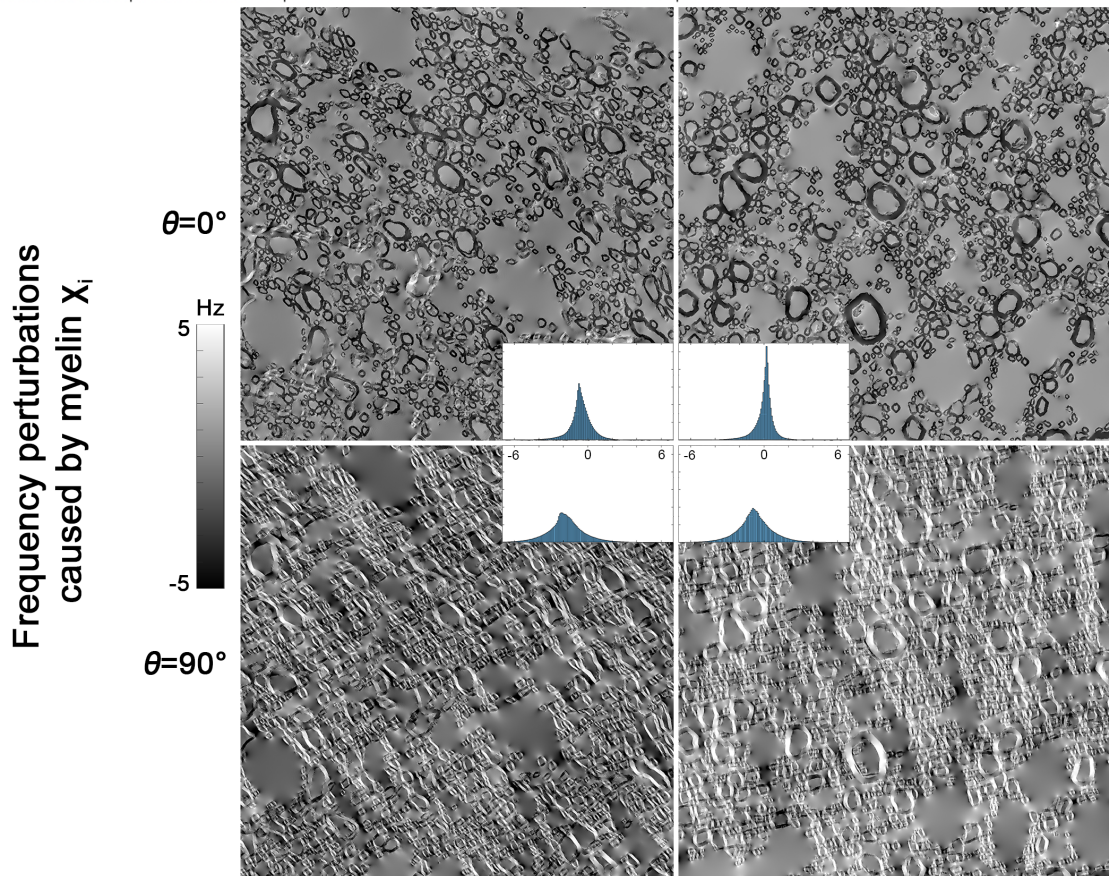

343

344 Figure 5: (Top) Summary of the 3D EM derived CC4 and CC5 microstructural properties. MVF was  
 345 separately probed using 5 different intensity thresholds (only the middle value indicated by \* was  
 346 showed in g-ratio). The corrected MVF was derived using Eq. [5]. (Bottom) Frequency induced by the  
 347 myelin  $\chi_1$  at two orientations to  $B_0$  ( $\theta=0^\circ$  &  $90^\circ$ ). Sub-figures show the frequency distributions in  
 348 extracellular space, where the locations and the FWHM of the peaks are shown in the above summary.

## 349 Discussion

350 In this study, we examined the magnetic susceptibility and microstructural  
351 compartmentalisation effect on MRI phase data on a formalin-fixed, post-mortem human brain  
352 specimen. The bulk magnetic susceptibility of the whole-brain specimen shows comparable  
353 contrast to those in the previous ex vivo studies (6,24), as well as to in vivo imaging: WM is  
354 slightly diamagnetic, whereas cortical and deep GM are paramagnetic. Further investigation  
355 reveals the residual fields of COSMOS have a gradient-like appearance varying from the  
356 surface toward the centre of the specimen (Figure 2E), which is similar to the expected way  
357 of how the solutions (fixative or water) diffused into the specimen. Since these residual fields  
358 are relatively constant across different rotations, it is likely to be caused by the exchange effect  
359 (17–19). These fields were captured as the non-susceptibility contributions by QUASAR and  
360 they did not have a significant impact on the bulk magnetic susceptibility measurement (Figure  
361 2C, 2G). This result is distinct from in vivo imaging results (Figure S1), where the susceptibility  
362 differences in WM are more noticeable, suggesting that the effect of (sub)cellular structure of  
363 WM is considerably reduced and the sphere of Lorentz inclusion utilised in COSMOS is  
364 already a good approximation on formalin-fixed tissue.

365  
366 While the bulk susceptibility of the WM samples in this study is similar to in vivo imaging, the  
367 residual field analysis inside the excised homogenous tissue confirmed that the microstructure  
368 compartmental frequency (parameter A in Eq. 4) is notably weaker in our samples than in vivo  
369 and reported by others. In a similar experiment (26), the amplitude of the microstructure  
370 frequency of a fresh bovine optic nerve at 7T was -18.75 ppb, significantly larger in magnitude  
371 and with an opposite sign to what we have obtained in our CC samples, 1.46 ppb. Additional  
372 analysis was performed to consolidate this result (see supplementary Figure S2). A reduction  
373 of the microstructural compartmentalisation effect had already been reported in the literature  
374 when studying fresh vs fixed rat optic nerves (25). One possible explanation is the structural  
375 alteration of the myelin sheath in fixed tissues. In our 3D EM images, we observed myelin  
376 sheath spitting and swelling in some of the myelinated axons, similar to the observation  
377 reported in the previous study (41), and such phenomena appeared more frequently in larger  
378 axons than small axons. Based on the general Lorentzian tensor approach (43), the increase  
379 of the aqueous space of the myelin sheath can result in the amplitude reduction of the induced  
380 frequency shifts inside the myelin sheath and the intra-axonal space. Microstructural  
381 differences related to structures (bovine optic nerve vs human CC) and age-associated  
382 demyelination (45,46), together with the tissue preparation methods can also contribute to the



383 differences observed in this study, as all these factors modulate the relative water  
384 concentration in the three WM compartments.

385

386 All six specimens obtained from the body of the CC have similar magnetic susceptibility  
387 anisotropy, suggesting that they have similar MVF based on the HCM approximation (Eq. S25  
388 in (17)), and this is supported by the EM analysis (0.278 & 0.257 between the two samples).  
389 The amplitude of the residual field inside the specimens is, on the other hand, subject to  
390 various properties including MVF, AVF and the aggregate g-ratio of the sample (Eq. A14 in  
391 (16)). Interestingly, the realistic geometry of the WM fibre also plays an important role in the  
392 compartmental frequency shifts (27,44). This effect is clearly illustrated in the frequency  
393 perturbation simulations in Figure 5: not only the centres but also the FWHM of the extra-  
394 cellular frequency distribution of the two samples are different, despite the two specimens  
395 having virtually identical MVF and AVF. The broader frequency spectrum of CC4 induces a  
396 faster  $R_2^*$  decay in the extra-axonal space and the specimen also has a more disperse fibre  
397 arrangement. These two factors together reduce the amplitude discrepancy between the slow  
398  $R_2^*$  (intra- and extra-axonal water) and the fast  $R_2^*$  (myelin water) compartments throughout  
399 the echo time as well as the frequency difference between those compartments that could  
400 result in a reduced compartmentalization effect.

401

402 The experimental setup, particularly the 3D-printed holder, is an effective tool also for other  
403 ex vivo studies that involve histology. The grid on the 3D-printed plates not only facilitates  
404 tissue excision with high precision but also provides landmarks in MRI images for experiment  
405 planning and sample matching. The close to unity linear relations of the susceptibility  
406 measurements between the two sessions (Figure 4A and 4B) support that the ROIs drawn on  
407 the whole-brain images and the excised specimens are corresponding to each other.

408

409 One limitation of this study is the relatively long fixation time of the specimen. The first imaging  
410 session happened after 5 months of fixation instead of the scheduled 2 months because of  
411 the coronavirus measures that took place in the Netherlands. The prolonged fixation time  
412 results in a substantial change of specimen  $R_1$  between the pre-scan and the first session  
413 (Figure 2A, 2B; average  $R_1$  across the brain increased from  $1.95 \pm 0.47 \text{ s}^{-1}$  to  $2.67 \pm 0.74 \text{ s}^{-1}$ ).  
414 The enhanced  $R_1$  in deep GM suggests the contribution of iron to the  $R_1$  was more pronounced.  
415 An alternative and more likely explanation would be that the myelin contribution to  $R_1$  could  
416 be reduced by the fixation process, which would also explain the diminished cortical GM and  
417 WM contrast observed at 5 months. Experiments conducted with a shorter fixation time can  
418 potentially reduce the fixation effects on the signal phase. However, progressive changes in

419 relaxation parameters begin in the early stage of fixation (23) and it is likely that fixation  
420 induced phase differences could also happen simultaneously. Lastly, the EM analysis can be  
421 subject to sampling bias due to the limited field-of-view. Preliminary results of a recent study  
422 suggest that large axons in the WM tissue can be under-represented in EM compared to light  
423 microscopy when larger field of view is available (45). Such under-representation may have  
424 an impact on the realistic geometry of the myelinated axons on the phase data.  
425

## 426 **Conclusion**

427 The contributions of MR phase contrast observed in the formalin-foxed brain specimen are  
428 substantially different from fresh tissue, despite the QSM maps derived from in vivo and ex  
429 vivo imaging sharing similar contrasts and values. Particularly, the reductions of magnetic  
430 susceptibility anisotropy and compartmentalisation are observed in the fixed WM tissue. An  
431 increase of non-susceptibility contributions to phase contrast can also be found in fixed tissue,  
432 which is potentially introduced by formalin fixation. Therefore, WM magnetic susceptibility and  
433 microstructural quantification findings in studies using formalin-fixed tissue should be  
434 interpreted with care. Our study suggests that the microstructural effects observed in our  
435 samples encode information regarding WM arrangements such as dispersion and packing  
436 while susceptibility anisotropy encodes myelin volume as was predicted from theory.

437

## 438 **Acknowledgement**

439 This work was funded by the Netherlands Organisation for Scientific Research (NWO) with  
440 project number FOM-N-31/16PR1056. The authors would like to thank Ms. Sibrecht Bouwstra  
441 for the 3D-printed holder construction, Ms. Shaghoyegh Abghari for laboratory support, Dr.  
442 Errin Johnson for 3D EM data acquisition, and Dr. Ferdinand Schweser for the fruitful  
443 discussion on magnetic susceptibility analysis including chemical exchange terms.

444

## 445 **References**

446

447 1. Rochefort L de, Liu T, Kressler B, et al. Quantitative susceptibility map reconstruction from  
448 MR phase data using bayesian regularization: Validation and application to brain imaging.  
449 *Magnetic resonance in medicine* 2010;63:194–206 doi: 10.1002/mrm.22187.

450 2. Deistung A, Schweser F, Reichenbach JR. Overview of quantitative susceptibility mapping.  
451 *NMR in biomedicine* 2016;30 doi: 10.1002/nbm.3569.

452 3. Wang Y, Liu T. Quantitative susceptibility mapping (QSM): Decoding MRI data for a tissue  
453 magnetic biomarker. *Magnetic Resonance in Medicine* 2014;73:82–101 doi:  
454 10.1002/mrm.25358.

455 4. Duyn JH, Gelderen P van, Li T-Q, Zwart JA de, Koretsky AP, Fukunaga M. High-field MRI  
456 of brain cortical substructure based on signal phase. *Proceedings of the National Academy of*  
457 *Sciences of the United States of America* 2007;104:11796–11801 doi:  
458 10.1073/pnas.0610821104.

459 5. He X, Yablonskiy DA. Biophysical mechanisms of phase contrast in gradient echo MRI.  
460 *Proceedings of the National Academy of Sciences* 2009;106:13558–13563 doi:  
461 10.1073/pnas.0904899106.

462 6. Langkammer C, Schweser F, Krebs N, et al. Quantitative susceptibility mapping (QSM) as  
463 a means to measure brain iron? A post mortem validation study. *Neuroimage* 2012;62:1593–  
464 1599 doi: 10.1016/j.neuroimage.2012.05.049.

465 7. Li W, Wu B, Avram AV, Liu C. Magnetic susceptibility anisotropy of human brain in vivo and  
466 its molecular underpinnings. *Neuroimage* 2012;59:2088–2097 doi:  
467 10.1016/j.neuroimage.2011.10.038.

468 8. Yablonskiy DA, He X, Luo J, Sukstanskii AL. Lorentz sphere versus generalized Lorentzian  
469 approach: What would lorentz say about it? *Magnetic Resonance in Medicine* 2014;72:4–7  
470 doi: 10.1002/mrm.25230.

471 9. Yablonskiy DA, Sukstanskii AL. Generalized Lorentzian Tensor Approach (GLTA) as a  
472 biophysical background for quantitative susceptibility mapping. *Magnetic Resonance in*  
473 *Medicine* 2015;73:757–764 doi: 10.1002/mrm.25538.

474 10. Yablonskiy DA, Sukstanskii AL. Effects of biological tissue structural anisotropy and  
475 anisotropy of magnetic susceptibility on the gradient echo MRI signal phase: theoretical  
476 background Liu C, Bowtell Richard, Schenck J, editors. *NMR in Biomedicine* 2017;30:e3655  
477 doi: 10.1002/nbm.3655.

478 11. Liu C. Susceptibility tensor imaging. *Magnetic resonance in medicine* 2010;63:1471–1477  
479 doi: 10.1002/mrm.22482.



- 480 12. Lee J, Shmueli K, Fukunaga M, et al. Sensitivity of MRI resonance frequency to the  
481 orientation of brain tissue microstructure. *Proceedings of the National Academy of Sciences*  
482 of the United States of America 2010;107:5130–5135 doi: 10.1073/pnas.0910222107.
- 483 13. MacKay A, Whittall K, Adler J, Li D, Paty D, Graeb D. In vivo visualization of myelin water  
484 in brain by magnetic resonance. *Magnetic resonance in medicine* 1994;31:673–677.
- 485 14. Sati P, Gelderen P van, Silva AC, et al. Micro-compartment specific T2\* relaxation in the  
486 brain. *Neuroimage* 2013;77:268–278 doi: 10.1016/j.neuroimage.2013.03.005.
- 487 15. Gelderen P van, Zwart JA de, Lee J, Sati P, Reich DS, Duyn JH. Nonexponential T2\*  
488 decay in white matter. *Magnetic resonance in medicine* 2011;67:110–117 doi:  
489 10.1002/mrm.22990.
- 490 16. Wharton S, Bowtell R. Gradient echo based fiber orientation mapping using R2\* and  
491 frequency difference measurements. *NeuroImage* 2013;83:1011–1023 doi:  
492 10.1016/j.neuroimage.2013.07.054.
- 493 17. Wharton S, Bowtell R. Fiber orientation-dependent white matter contrast in gradient echo  
494 MRI. *Proceedings of the National Academy of Sciences* 2012;109:18559–18564 doi:  
495 10.1073/pnas.1211075109.
- 496 18. Luo J, He X, d'Avignon DA, Ackerman JJH, Yablonskiy DA. Protein-induced water 1H MR  
497 frequency shifts: Contributions from magnetic susceptibility and exchange effects. *J Magn*  
498 *Reson* 2010;202:102–108 doi: 10.1016/j.jmr.2009.10.005.
- 499 19. Shmueli K, Dodd SJ, Gelderen P van, Duyn JH. Investigating lipids as a source of chemical  
500 exchange-induced MRI frequency shifts. Liu C, Bowtell Richard, Schenck J, editors. *NMR in*  
501 *biomedicine* 2017;30:e3525 doi: 10.1002/nbm.3525.
- 502 20. Stikov N, Campbell JSW, Stroh T, et al. In vivo histology of the myelin g-ratio with magnetic  
503 resonance imaging. *NeuroImage* 2015;118:397–405 doi: 10.1016/j.neuroimage.2015.05.023.
- 504 21. Langkammer C, Krebs N, Goessler W, et al. Quantitative MR Imaging of Brain Iron: A  
505 Postmortem Validation Study. *Radiology* 2010;257:455–462 doi: 10.1148/radiol.10100495.
- 506 22. Seifert AC, Umphlett M, Hefti M, Fowkes M, Xu J. Formalin tissue fixation biases myelin-  
507 sensitive MRI. *Magnetic resonance in medicine* 2019;82:1504–1517 doi: 10.1002/mrm.27821.
- 508 23. Shatil AS, Uddin MN, Matsuda KM, Figley CR. Quantitative Ex Vivo MRI Changes due to  
509 Progressive Formalin Fixation in Whole Human Brain Specimens: Longitudinal  
510 Characterization of Diffusion, Relaxometry, and Myelin Water Fraction Measurements at 3T.  
511 *Frontiers in medicine* 2018;5:31 doi: 10.3389/fmed.2018.00031.
- 512 24. Evia AM, Kotrotsou A, Tamhane AA, et al. Ex-vivo quantitative susceptibility mapping of  
513 human brain hemispheres. Connor JR, editor. *PLOS ONE* 2017;12:e0188395 doi:  
514 10.1371/journal.pone.0188395.

- 515 25. Luo J, He X, Yablonskiy DA. Magnetic susceptibility induced white matter MR signal  
516 frequency shifts—experimental comparison between Lorentzian sphere and generalized  
517 Lorentzian approaches. *Magnetic Resonance in Medicine* 2014;71:1251–1263 doi:  
518 10.1002/mrm.24762.
- 519 26. Wharton S, Bowtell R. Effects of white matter microstructure on phase and susceptibility  
520 maps. *Magnetic Resonance in Medicine* 2015;73:1258–1269 doi: 10.1002/mrm.25189.
- 521 27. Hédouin R, Metere R, Chan K-S, et al. Decoding the microstructural properties of white  
522 matter using realistic models. *Neuroimage* 2021;237:118138 doi:  
523 10.1016/j.neuroimage.2021.118138.
- 524 28. Veraart J, Novikov DS, Christiaens D, Ades-aron B, Sijbers J, Fieremans E. Denoising of  
525 diffusion MRI using random matrix theory. *Neuroimage* 2016;142:394–406 doi:  
526 10.1016/j.neuroimage.2016.08.016.
- 527 29. Andersson JLR, Skare S, Ashburner J. How to correct susceptibility distortions in spin-  
528 echo echo-planar images: application to diffusion tensor imaging. *Neuroimage* 2003;20:870–  
529 888 doi: 10.1016/s1053-8119(03)00336-7.
- 530 30. Smith SM, Jenkinson M, Woolrich MW, et al. Advances in functional and structural MR  
531 image analysis and implementation as FSL. *Neuroimage* 2004;23:S208–S219 doi:  
532 10.1016/j.neuroimage.2004.07.051.
- 533 31. Andersson JLR, Sotiropoulos SN. An integrated approach to correction for off-resonance  
534 effects and subject movement in diffusion MR imaging. *Neuroimage* 2016;125:1063–1078 doi:  
535 10.1016/j.neuroimage.2015.10.019.
- 536 32. Avants BB, Tustison NJ, Song G, Cook PA, Klein A, Gee JC. A reproducible evaluation of  
537 ANTs similarity metric performance in brain image registration. *Neuroimage* 2011;54:2033–  
538 2044 doi: 10.1016/j.neuroimage.2010.09.025.
- 539 33. Khabipova D, Wiaux Y, Gruetter R, Marques JP. A modulated closed form solution for  
540 quantitative susceptibility mapping—a thorough evaluation and comparison to iterative  
541 methods based on edge prior knowledge. *Neuroimage* 2015;107:163–174 doi:  
542 10.1016/j.neuroimage.2014.11.038.
- 543 34. Karsa A, Shmueli K. SEGUE: a Speedy rEgion-Growing algorithm for Unwrapping  
544 Estimated phase. *IEEE Transactions on Medical Imaging* 2018;38:1347–1357 doi:  
545 10.1109/tmi.2018.2884093.
- 546 35. Robinson SD, Bredies K, Khabipova D, Dymerska B, Marques JP, Schweser F. An  
547 illustrated comparison of processing methods for MR phase imaging and QSM: combining  
548 array coil signals and phase unwrapping. Liu C, Bowtell Richard, Schenck J, editors. *NMR in*  
549 *biomedicine* 2017;30:e3601 doi: 10.1002/nbm.3601.

- 550 36. Zhou D, Liu T, Spincemaille P, Wang Y. Background field removal by solving the Laplacian  
551 boundary value problem. *NMR in biomedicine* 2014;27:312–319 doi: 10.1002/nbm.3064.
- 552 37. Chan K-S, Marques JP. SEPIA—Susceptibility mapping pipeline tool for phase images.  
553 *Neuroimage* 2021;227:117611 doi: 10.1016/j.neuroimage.2020.117611.
- 554 38. Liu T, Spincemaille P, Rochefort L de, Kressler B, Wang Y. Calculation of susceptibility  
555 through multiple orientation sampling (COSMOS): A method for conditioning the inverse  
556 problem from measured magnetic field map to susceptibility source image in MRI. *Magnetic  
557 resonance in medicine* 2009;61:196–204 doi: 10.1002/mrm.21828.
- 558 39. Schweser F, Zivadinov R. Quantitative susceptibility mapping (QSM) with an extended  
559 physical model for MRI frequency contrast in the brain: a proof-of-concept of quantitative  
560 susceptibility and residual (QUASAR) mapping. *NMR in Biomedicine* 2018;31:e3999 doi:  
561 10.1002/nbm.3999.
- 562 40. Kleinnijenhuis M, Johnson E, Mollink J, Jbabdi S, Miller KL. A semi-automated approach  
563 to dense segmentation of 3D white matter electron microscopy. *Biorxiv*  
564 2020:2020.03.19.979393 doi: 10.1101/2020.03.19.979393.
- 565 41. Duijn S van, Nabuurs RJA, Rooden S van, et al. MRI artifacts in human brain tissue after  
566 prolonged formalin storage. *Magnetic resonance in medicine* 2011;65:1750–1758 doi:  
567 10.1002/mrm.22758.
- 568 42. Yushkevich PA, Piven J, Hazlett HC, et al. User-guided 3D active contour segmentation  
569 of anatomical structures: Significantly improved efficiency and reliability. *Neuroimage*  
570 2006;31:1116–1128 doi: 10.1016/j.neuroimage.2006.01.015.
- 571 43. Yablonskiy DA, Sukstanskii AL. Lorentzian effects in magnetic susceptibility mapping of  
572 anisotropic biological tissues. *Journal of Magnetic Resonance* 2018;292:129–136 doi:  
573 10.1016/j.jmr.2018.04.014.
- 574 44. Xu T, Foxley S, Kleinnijenhuis M, Chen WC, Miller KL. The effect of realistic geometries  
575 on the susceptibility-weighted MR signal in white matter. *Magnetic resonance in medicine*  
576 2017;4:153–500 doi: 10.1002/mrm.26689.
- 577 45. Mordhorst L, Morozova M, Papazoglou S, et al. A representative reference for MRI-based  
578 human axon radius assessment using light microscopy. *Biorxiv* 2021:2021.06.03.446739 doi:  
579 10.1101/2021.06.03.446739.
- 580
